# Supplementary material for: Mortality and postoperative complications after different types of surgical reconstruction following pancreaticoduodenectomy—a systematic review with meta-analysis
Source: Springer Nature journal article supplement (doi:10.1007/s00423-019-01762-5), 2019-02-28
Supplement: 423_2019_1762_MOESM11_ESM.docx [file 423_2019_1762_MOESM11_ESM.docx]

| Author | Confounding bias | Selection | Definition of intervention | Missing data | Measurement of outcome | Reported results | Overall |
| --- | --- | --- | --- | --- | --- | --- | --- |
| Ke et al. 2013 [48] |  |  |  |  |  |  |  |
| Tani et al. 2014 [49] |  |  |  |  |  |  |  |
| Ballas et al. 2010 [50] |  |  |  |  |  |  |  |
| Kaman et al. 2008 [51] |  |  |  |  |  |  |  |
| Perwaiz et al. 2006 [52] |  |  |  |  |  |  |  |
| Fujieda et al. 2017 [29] |  |  |  |  |  |  |  |
| Hwang et al. 2016 [26] |  |  |  |  |  |  |  |
| Kakaei et al. 2015 [30] |  |  |  |  |  |  |  |
| Hochwald et al. 2009 [25] |  |  |  |  |  |  |  |
| Meng et al. 2015 [39] |  |  |  |  |  |  |  |
| Nikfarjam et al. 2012 [40] |  |  |  |  |  |  |  |
| Cordesmeyer et al. 2014 [41] |  |  |  |  |  |  |  |
| Hu et al. 2016 [42] |  |  |  |  |  |  |  |
| Liu et al. 2014 [43] |  |  |  |  |  |  |  |
| Wang et al. 2013 [44] |  |  |  |  |  |  |  |
| Watanabe et al. 2015 [45] |  |  |  |  |  |  |  |
| Xu et al. 2015 [46] |  |  |  |  |  |  |  |
| Zhang et al. 2014[47] |  |  |  |  |  |  |  |
| Author | Confounding bias | Selection | Definition of intervention | Missing data | Measurement of outcome | Reported results | Overall |
| Ke et al. 2013 [48] |  |  |  |  |  |  |  |
| Tani et al. 2014 [49] |  |  |  |  |  |  |  |
| Ballas et al. 2010 [50] |  |  |  |  |  |  |  |
| Kaman et al. 2008 [51] |  |  |  |  |  |  |  |
| Perwaiz et al. 2006 [52] |  |  |  |  |  |  |  |
| Fujieda et al. 2017 [29] |  |  |  |  |  |  |  |
| Hwang et al. 2016 [26] |  |  |  |  |  |  |  |
| Kakaei et al. 2015 [30] |  |  |  |  |  |  |  |
| Hochwald et al. 2009 [25] |  |  |  |  |  |  |  |
| Meng et al. 2015 [39] |  |  |  |  |  |  |  |
| Nikfarjam et al. 2012 [40] |  |  |  |  |  |  |  |
| Cordesmeyer et al. 2014 [41] |  |  |  |  |  |  |  |
| Hu et al. 2016 [42] |  |  |  |  |  |  |  |
| Liu et al. 2014 [43] |  |  |  |  |  |  |  |
| Wang et al. 2013 [44] |  |  |  |  |  |  |  |
| Watanabe et al. 2015 [45] |  |  |  |  |  |  |  |
| Xu et al. 2015 [46] |  |  |  |  |  |  |  |
| Zhang et al. 2014[47] |  |  |  |  |  |  |  |

**eTable 1: Quality assessment of the included study by ROBINS-I tool**

Studies of the systematic review were screened according to the items of the Risk Of Bias in Non-randomized Studies – of Interventions/ROBINS-I for confounding bias. A green circle remark a low risk of bias, a yellow circle a moderate risk of bias and red a serious risk of bias of the different study.
